1 **Investigating the role of exudates in recruiting *Streptomyces* bacteria to the *Arabidopsis***  
2 ***thaliana* root microbiome**

3  
4 Sarah F. Worsley<sup>1</sup>, Michael C. Macey<sup>2</sup>, Jake T. Newitt<sup>1</sup>, Elaine Patrick<sup>1</sup>, Douglas W. Yu<sup>1,3,4</sup>,  
5 Barrie Wilkinson<sup>5</sup>, J. Colin Murrell<sup>2</sup> and Matthew I Hutchings<sup>1\*</sup>

6  
7  
8 <sup>1</sup>School of Biological Sciences, University of East Anglia, Norwich Research Park, Norwich,  
9 Norfolk, United Kingdom. NR4 7TJ.

10 <sup>2</sup>School of Environmental Sciences, University of East Anglia, Norwich Research Park,  
11 Norwich, Norfolk, United Kingdom. NR4 7TJ.

12 <sup>3</sup> State Key Laboratory of Genetic Resources and Evolution, Kunming Institute of Zoology,  
13 Chinese Academy of Sciences, Kunming Yunnan, 650223 China

14 <sup>4</sup> Center for Excellence in Animal Evolution and Genetics, Chinese Academy of Sciences,  
15 Kunming Yunnan, 650223 China

16 <sup>5</sup>Department of Molecular Microbiology, John Innes Centre, Norwich Research Park,  
17 Norwich, Norfolk, United Kingdom. NR4 7UH.

18  
19 Email: [m.hutchings@uea.ac.uk](mailto:m.hutchings@uea.ac.uk)

24 **Abstract.** *Arabidopsis thaliana* has a diverse but consistent root microbiome, recruited in part  
25 by the release of fixed carbon in root exudates. Here we focussed on the recruitment of  
26 *Streptomyces* bacteria, which are well established plant-growth-promoting rhizobacteria and  
27 which have been proposed to be recruited to *A. thaliana* roots by the release of salicylic acid.  
28 We generated high quality genome sequences for eight *Streptomyces* endophyte strains and  
29 showed that although some strains do enhance plant growth, they are not attracted to, and do  
30 not feed on, salicylic acid. We used  $^{13}\text{CO}_2$  DNA-stable isotope probing to determine which  
31 bacteria are fed by the plants in the rhizo- and endosphere and found that streptomycetes did  
32 not feed on root exudates *in vivo*, despite the fact that they can use exudate as sole carbon and  
33 nitrogen sources *in vitro*. We confirmed increased root colonisation by streptomycetes in plants  
34 that constitutively produce salicylic acid, but these plants exhibited a pleiotropic phenotype of  
35 early senescence and weak growth. We propose that streptomycetes are attracted to the  
36 rhizosphere by root exudates but can be outcompeted for this food source by more abundant  
37 proteobacteria and most likely feed off unlabelled complex organic matter.

38

39

40

41

42

43 **Introduction.** Plants form stable and beneficial interactions with bacteria at all stages of their  
44 life cycle, but we have a limited understanding of how these interactions are directed or  
45 maintained. Young plants can release 30-40% of photosynthetically fixed carbon into the soil  
46 as root exudates and these help shape the plant microbiome (Haichar et al 2016, Whipps 1990).  
47 Exudates contain a diverse range of compounds, many of which may be metabolized by  
48 beneficial bacterial communities (Bais et al 2006, Zhalnina et al 2018). Understanding the  
49 signals that recruit different bacterial taxa is economically important because plant-growth-  
50 promoting rhizobacteria (PGPR) can increase crop growth and protect against disease (Berg  
51 2009). There is growing interest and investment in biological solutions to crop loss, including  
52 the application of beneficial microbes as seed coatings and supplements to agricultural soils  
53 (Berg 2009, Wei and Jousset 2017). Increasing the presence of antibiotic-producing bacteria  
54 such as *Streptomyces* species in agricultural soils has been shown to suppress fungal pathogens  
55 in numerous recent studies, (e.g. Cha et al 2016, Inderbitzin et al 2018, Ren et al 2018, Zhou  
56 et al 2018) and some *Streptomyces* endophyte species are marketed as fungal growth  
57 suppressors (Chaurasia et al 2018, Rey and Dumas 2017, Viaene et al 2016).

58 *Streptomyces* are saprophytic bacteria that play an important ecological role as  
59 composters in soil and as prolific producers of antibiotics (van der Meij et al 2017). They  
60 evolved filamentous growth ca. 440 mya when plants were first colonising land and it has been  
61 suggested that this enabled them to successfully colonise plant roots (Chater 2016). Several  
62 studies have reported that streptomycetes are abundant inside the roots of the model plant  
63 *Arabidopsis thaliana* (Bai et al 2015, Bodenhausen et al 2013, Bulgarelli et al 2012, Carvalhais  
64 et al 2015, Lebeis et al 2015, Lundberg et al 2012, Schlaeppi et al 2014), and others have shown  
65 that streptomycetes can protect crop plants such as strawberry, lettuce, rice, and wheat against  
66 biotic and abiotic stressors, including drought, salt stress, and fungal pathogens (see Schrey  
67 and Tarkka 2008, Viaene et al 2016 for recent reviews). Recent studies have reported that the  
68 proportion of *Streptomyces* bacteria in the *A. thaliana* rhizosphere and roots is positively  
69 correlated with the levels of phenolic compounds released in *A. thaliana* root exudates,  
70 including the defence hormone salicylic acid (SA) (Badri et al 2013, Carvalhais et al 2015,  
71 Lebeis et al 2015). It was also reported recently that some phytohormones induce the  
72 production of antimicrobial compounds by endophytic streptomycetes (van der Meij et al  
73 2018). Not all plant species enrich streptomycetes in their roots, a notable example being  
74 barley, and this suggests there are plant-specific signals that shape the root microbiota  
75 (Bulgarelli et al 2012, Bulgarelli et al 2015, Haichar et al 2008).

76 In this study we set out to identify which root and rhizosphere bacteria feed off *A.*  
77 *thaliana* root exudates and to test the previously published hypothesis that *Streptomyces*  
78 bacteria use plant-produced SA as a sole carbon source (Lebeis et al 2015). We report that  
79 *Streptomyces* endophytes and other *Streptomyces* strains can indeed grow *in vitro* using *A.*  
80 *thaliana* root exudates as a sole carbon and nitrogen source, but *in vivo*, DNA stable isotope  
81 probing (DNA-SIP) revealed that *Streptomyces* were not feeding off root exudates in the  
82 rhizosphere or the endophytic compartment. We also show that, although root colonisation by  
83 *Streptomyces* endophyte isolates increases in *A. thaliana cpr5* plants (which constitutively  
84 produce SA) as has been reported previously (Lebeis et al 2015), these isolates were not  
85 attracted to SA and could not grow using SA as a sole carbon source. We conclude that  
86 colonisation was likely influenced by the pleiotropic effects of the *cpr5* mutation.

87

## 88 **Materials and Methods.**

89

90 **Isolation of *Streptomyces* endophytes.** Wild-type *A. thaliana* Col-0 seeds were sterilised by  
91 washing in 70% (v/v) ethanol for 2 minutes, 20% (v/v) sodium hypochlorite for 2 minutes, then  
92 five times in sterile water. Individual seeds were sown into pots of sieved Levington F2  
93 compost, placed at 4°C for 24 hours, then grown for 4 weeks under conditions of 12 hours light  
94 / 12 hours dark at 22°C. Plants were taken aseptically from pots and roots tapped firmly to  
95 remove as much adhering soil as possible. Root material was then placed into sterile PBS-S  
96 buffer (PBS-S: 6.33 g NaH<sub>2</sub>PO<sub>4</sub>.H<sub>2</sub>O, 16.5 g Na<sub>2</sub>HPO<sub>4</sub>.H<sub>2</sub>O dissolved in 1L dH<sub>2</sub>O, to which  
97 200 µl Silwet L-77 was added after autoclaving) for 30 minutes on a shaking platform. Roots  
98 were placed into fresh PBS-S and washed for 30 minutes before removing any remaining soil  
99 particles with sterile tweezers. Cleaned roots were transferred to 25ml fresh PBS-S and  
100 sonicated for 20 minutes in a sonicating water bath to remove any remaining material still  
101 attached to the root (as described in Bulgarelli et al 2012). The roots were crushed in sterile  
102 10% (v/v) glycerol and serial dilutions were spread onto either soya flour mannitol (SFM) agar,  
103 starch casein agar, or minimal medium agar containing sodium citrate (Lebeis et al 2015).  
104 Plates were incubated at 30°C for up to 14 days. Colonies resembling streptomycetes were re-  
105 streaked onto SFM agar and identified by 16S rRNA gene PCR amplification and sequencing  
106 with universal primers PRK341F and MPRK806R (see Table S1 for primers, plasmids and  
107 strains used in this work). *Streptomyces* strains were maintained on SFM agar (N1, N2, M2,  
108 M3 and *S. coelicolor* M145), Maltose/Yeast extract/Malt extract (MYM) agar with trace

109 elements (L2) or ISP2 agar (*S. lydicus* strains); media recipes are detailed in Table S2. Spore  
110 stocks were made as described previously (Kieser et al 2000).

111

112 **Genome sequencing and analysis.** High quality genome sequences were obtained for newly  
113 isolated strains N1, N2, M2, M3, and L2, as well as three known strains of *Streptomyces*  
114 *lydicus*; one isolated from the commercial plant growth-promoting product Actinovate and two  
115 additional *S. lydicus* strains (ATCC25470 and ATCC31975) obtained from the American Type  
116 Culture Collection. Strains were sequenced using PacBio RSII sequencing technology at the  
117 Earlham Institute, Norwich, UK, (as described in Holmes et al 2018). Biosynthetic gene  
118 clusters were predicted using antiSMASH 4.0, and genomes were annotated using RAST (Aziz  
119 et al 2008, Weber et al 2015). Amino acid sequences were uploaded to the KEGG Automatic  
120 Annotation Server (KAAS) for functional annotation of genes and metabolic pathway  
121 mapping. To identify whether isolates carried homologues to known salicylic acid (SA)  
122 degradation genes, all experimentally verified pathways involving SA (or salicylate)  
123 degradation were identified using the MetaCyc database (<http://www.metacyc.org/>). Amino  
124 acid sequences of characterised genes involved in each of the five pathways were then retrieved  
125 from UniProt and used to perform Blast searches against predicted ORFs for each  
126 streptomycete strain. The results of the best hit (% identity and % query coverage) are given in  
127 Table S3.

128

129 **Antibiotic bioassays.** *Streptomyces* spores (4  $\mu$ l of  $10^6$  spores  $\text{ml}^{-1}$ ) were pipetted onto the  
130 centre of agar plates and incubated at 30 °C for 7 days before adding indicator strains. *Candida*  
131 *albicans*, *Bacillus subtilis*, a clinical isolate of Methicillin Resistant *Staphylococcus aureus*  
132 isolated from a patient at the Norfolk and Norwich University Hospital UK (Qin et al 2017),  
133 *Escherichia coli* and *Pseudomonas syringae* DC3000 were grown overnight in 10 ml Lysogeny  
134 Broth (LB) (1% tryptone, 0.5% NaCl, supplemented with 0.1% glucose for *P. syringae*). These  
135 were sub-cultured 1 in 20 (v/v) for a further 4 hours at 30°C for *P. syringae* and 37°C for *E.*  
136 *coli*. These cultures were then used to inoculate 100 ml of molten LB (0.5% agar, plus 0.1%  
137 glucose for *P. syringae*), of which 3 ml was used to overlay agar plates containing *Streptomyces*  
138 colonies. Plates were incubated for 48 hours at 30°C, and bioactivity was indicated by a clear  
139 halo around the *Streptomyces* colony. For bioassays using the fungal strains *Lomentospora*  
140 *prolificans* or *Gaeumannomyces graminis*, *Streptomyces* species were grown for 7 days, and  
141 then a plug of the fungus (grown on potato glucose agar, Sigma Aldrich, for 14 days) was

142 placed at the edge of the agar plate. Plates were incubated at 25°C for up to 14 days to assess  
143 inhibition of fungal growth. Bioassays were carried out on a range of different media (Tables  
144 S2, S4).

145  
146 ***In vitro* Plant growth promotion assays.** *A. thaliana* col-0 seeds were sterilised and plated  
147 onto Murashige and Skoog (MS) medium (Duchefa Biochemie, Harlem, Netherlands) (4.43 g  
148 L<sup>-1</sup> in dH<sub>2</sub>O, supplemented with 1% (w/v) sucrose and 0.8% (w/v) agar) which were then left  
149 at 4 °C in the dark for 24 hours before being placed, vertically, under long day growth  
150 conditions (12 h light / 12 h dark) at 22°C for 10 days. Seedlings were then transferred to square  
151 agar plates containing MS agar (1.5% agar, 0% sucrose) and allowed to equilibrate, vertically,  
152 overnight at 22 °C. *Streptomyces* spores were diluted to 10<sup>6</sup> spores ml<sup>-1</sup>, and 1 µl of this solution  
153 was added to the top of the root system of each seedling and allowed to dry. 16 replicate  
154 seedlings were inoculated per *Streptomyces* strain. 10% (v/v) glycerol was added to control  
155 seedlings. Plates were grown vertically for 16 days, 12 h light/12 h dark at 22°C before  
156 measuring plant biomass (dry weight). The biomass of plants with different inocula were  
157 compared via ANOVA and Tukey's Honestly Significant Difference (HSD) tests; biomass was  
158 log-transformed to ensure normality.

159  
160 **IAA production assays** *Streptomyces* isolates were grown on cellophane membranes covering  
161 YMD media (Table S2) supplemented with 5 mM tryptophan. After 7 days, cellophane  
162 membranes with bacterial biomass were removed and plates were flooded with Salkowskis  
163 reagent (as in Bric et al 1991). A red colour indicates that IAA has leached into the medium.

164  
165 **Collection of root exudates.** Seeds were sterilised as above and placed at 4°C for 24 hours  
166 before being grown, vertically, in conditions of 12 h light/12 h dark for 7 days at 22°C on MS  
167 agar. Seedlings were transferred to 12 well plates, containing 3 ml of liquid MS (0% sucrose)  
168 in each well and then grown for 10 days before being washed and transferred to new wells  
169 containing 3 ml sterile water for 5 days. After removing plant material, liquid from each well  
170 was filter-sterilised and added to sterile agarose (0.8% w/v) to make solid growth medium  
171 plates. Spores of each *Streptomyces* isolate were streaked onto these plates and incubated for  
172 7 days at 30°C. Agarose/water (0.8% w/v) plates were used as a control to assess growth on  
173 root exudates.

174

175 **Stable Isotope Probing.** Sterilised *A. thaliana* seeds were sown singly in pots containing 100  
176 ml sieved Levington F2 compost, soaked with dH<sub>2</sub>O. These were placed in the dark at 4°C for  
177 48 hours, then transferred to short-day growth conditions (8 h light/16 h dark) at 22°C for 32  
178 days before exposure to CO<sub>2</sub>. Each plant was placed in air-tight, transparent 1.9 L cylindrical  
179 tubes. Three plants were exposed to 1000 ppmv of <sup>12</sup>CO<sub>2</sub> and three plants were exposed to  
180 1000 ppmv of <sup>13</sup>CO<sub>2</sub> (99%, Cambridge isotopes, Massachusetts, USA). Three unplanted  
181 controls containing only Levington F2 compost were additionally exposed to 1000 ppmv of  
182 <sup>13</sup>C labelled CO<sub>2</sub> to control for autotrophic consumption of CO<sub>2</sub> by soil microbes. CO<sub>2</sub>  
183 treatments took place over a period of 21 days (ending 53 days after germination). CO<sub>2</sub> was  
184 manually injected into tubes every 20 minutes over the course of the 8 hour light period, to  
185 maintain the CO<sub>2</sub> concentration at ~1000 ppmv. The volume of CO<sub>2</sub> to be added at each  
186 injection was determined by measuring the rate of uptake of CO<sub>2</sub> over 20 minutes every 4 days.  
187 CO<sub>2</sub> was measured using an Agilent 7890A gas chromatography instrument with a flame  
188 ionisation detector and a Poropak Q (6ft x 1/8”) HP plot/Q (30 m x 0.530 mm, 40 µm film)  
189 column with a nickel catalyst and a nitrogen carrier gas. The instrument was run with the  
190 following settings: injector temperature 250°C, detector temperature 300°C, column  
191 temperature 115°C and oven temperature 50°C. The injection volume was 100 µl and the run  
192 time was 5 mins, with CO<sub>2</sub> having a retention time of 3.4 mins. Peak areas were compared to  
193 a standard curve (standards of known CO<sub>2</sub> concentration were prepared in 120 ml serum vials  
194 that had been flushed with 80%/20% nitrogen-oxygen mixture). At the end of the light period  
195 each day, tube lids were removed to prevent the build-up of respiratory CO<sub>2</sub> during the dark  
196 period. Just before the next light period, tubes were flushed with an 80%/20% nitrogen-oxygen  
197 mix to remove any residual CO<sub>2</sub> before replacing the lids and beginning the first injection of  
198 1.9 ml CO<sub>2</sub>.

199

200 **Sampling and DNA extraction from CO<sub>2</sub> incubated soil, rhizosphere, and roots.** Two  
201 samples of root-free “bulk soil” were collected from each planted and unplanted pot; samples  
202 were snap-frozen in liquid nitrogen and stored at -80°C. For the planted pots, roots were tapped  
203 until only soil firmly adhering to the root surface remained; the remaining soil was defined as  
204 the rhizosphere fraction. To collect this, roots were placed in 25 ml sterile, PBS-S buffer (see  
205 above) and washed on a shaking platform at top speed for 30 min before transfer to fresh PBS-  
206 S. Used PBS-S from the first washing stage was centrifuged at 3200 x g for 15 minutes, and  
207 the supernatant was removed. The resulting pellet (the rhizosphere sample) was snap-frozen

208 and stored at  $-80^{\circ}\text{C}$ . The roots were then shaken in fresh PBS-S for a further 30 minutes before  
209 removing any remaining soil particles with sterile tweezers. The cleaned roots were finally  
210 transferred to fresh PBS-S and sonicated for 20 minutes in a sonicating water bath (as described  
211 in Bulgarelli et al 2012). The root (“endophytic”) sample for each plant was then separated into  
212 two samples, and snap frozen and stored at  $-80^{\circ}\text{C}$ . The endophytic sample consisted of bacteria  
213 within the roots and those very firmly attached to the root surface (the “rhizoplane”). A  
214 modified version of the manufacturer’s protocol for the FastDNA™ SPIN Kit for Soil (MP  
215 Biomedicals) was used to extract DNA from soil, rhizosphere, and root samples. Modifications  
216 included pre-homogenisation of the root material by grinding in liquid nitrogen before addition  
217 of lysis buffer, an extended incubation time (10 minutes) in DNA matrix buffer, and elution in  
218 150  $\mu\text{l}$  of sterile water. DNA yields were quantified using a Qubit fluorimeter.

219

220 **Density gradient ultracentrifugation and fractionation.** DNA samples from the  
221 rhizosphere, roots, and unplanted soil were subjected to caesium chloride (CsCl) density  
222 gradient separation using an established protocol (Neufeld et al 2007). For each of the replicate  
223 rhizosphere samples from both the  $^{12}\text{CO}_2$  and  $^{13}\text{CO}_2$  incubated plants, 1.5  $\mu\text{g}$  of DNA was  
224 loaded into the CsCl solution with gradient buffer. For the three unplanted soil sample  
225 replicates, 1  $\mu\text{g}$  of DNA was used. For the three root sample replicates under each of the planted  
226 treatments ( $^{12}\text{CO}_2$  and  $^{13}\text{CO}_2$ ), it was necessary to combine the three replicates as the low DNA  
227 yields from each sample did not meet the minimum DNA yield requirement (0.5  $\mu\text{g}$ ) for  
228 ultracentrifugation on their own. Thus, 0.2  $\mu\text{g}$  of DNA was pooled from each of the three  
229 replicates per  $^{12}\text{CO}_2$  and  $^{13}\text{CO}_2$  treatment, and the final 0.6  $\mu\text{g}$  was loaded into the CsCl  
230 solution. After ultracentrifugation, the density of each fraction was measured using a  
231 refractometer in order to check for successful gradient formation. DNA was precipitated from  
232 fractions as detailed in Neufeld et al 2007 and stored at  $-20^{\circ}\text{C}$  before use as a template in qPCR  
233 and PCR reactions.

234

235 **Fraction selection via qPCR and 16S rRNA gene amplicon sequencing.** To identify  
236 fractions containing heavy ( $^{13}\text{C}$ ) and light ( $^{12}\text{C}$ ) DNA for each sample, 16S rRNA gene copy  
237 number was quantified across fractions using qPCR. Reactions were carried out in 25  $\mu\text{l}$   
238 volumes. 1  $\mu\text{l}$  of template DNA (either sample DNA or standard DNA), or  $\text{dH}_2\text{O}$  as a control,  
239 was added to 24  $\mu\text{l}$  of reaction mix containing 12.5  $\mu\text{l}$  of the 2x Sybr Green Jumpstart Taq  
240 Ready-mix (Sigma Aldrich), 0.125  $\mu\text{l}$  each of the primers 341F 806R, 4  $\mu\text{l}$  of 25 mM  $\text{MgCl}_2$ ,



241 0.25  $\mu$ l of 20  $\mu$ g/ $\mu$ l Bovine Serum Albumin, and 7  $\mu$ l dH<sub>2</sub>O. Sample DNA, standards (a dilution  
242 series of the target 16S rRNA gene at known quantities), and negative controls were quantified  
243 in duplicate. Reactions were run under the following conditions: 96°C for 10 mins; 40 cycles  
244 of 96°C for 30 sec, 52°C for 30 sec, and 72°C for 1 min; 96°C for 15 sec; 100 cycles at 75°C-  
245 95°C for 10 secs, ramping 0.2°C per cycle. Reactions were performed in 96-well plates (Bio-  
246 Rad). The threshold cycle ( $C_T$ ) for each sample was then converted to target molecule number  
247 by comparing to  $C_T$  values of a dilution series of target DNA standards. Following  
248 quantification of 16S rRNA gene number in each fraction, fractions spanning the peaks in 16S  
249 rRNA gene copy number were identified. Equal quantities of each fraction were combined to  
250 create a “heavy” buoyant density (labelled) and “light” buoyant density (unlabelled) fraction  
251 for each sample, respectively. The 16S rRNA genes were amplified for each of these fractions  
252 using the Universal primers PRK341F and MPRK806R (Table S1), and the resulting PCR  
253 product was purified and submitted for 16S rRNA gene amplicon sequencing using an Illumina  
254 MiSeq at Mr DNA (Molecular Research LP), Shallowater, Texas, USA. Sequence data were  
255 then processed at Mr DNA using their custom pipeline (Dowd et al 2008a, Dowd et al 2008b).  
256 As part of this pipeline, pair-end sequences were merged, barcodes were trimmed, and  
257 sequences of less than 150 bp and/or with ambiguous base calls were removed. The resulting  
258 sequences were denoised, and OTUs were assigned by clustering at 97% similarity. Chimeras  
259 were removed, and OTUs were assigned taxonomies using *BlastN* against a curated database  
260 from GreenGenes, RDPII, and NCBI (DeSantis et al 2006). Plastid-like sequences were  
261 removed from the analysis. All data received from Mr DNA were then statistically analysed  
262 using *R* 3.2.3 (2015). All the 16S rRNA gene amplicon sequences have been submitted to the  
263 European Nucleotide Archive (ENA) database under the study accession number  
264 PRJEB30923.

265

266 **Generating eGFP-labelled *Streptomyces* strains.** Plasmid pIJ8660 (Table S1, John Innes  
267 Centre, Norwich, UK) containing an optimised eGFP gene under the control of the constitutive  
268 *ermE\** promoter and the *aac* apramycin resistance marker (Sun et al 1999) was conjugated into  
269 *Streptomyces* strains (as described in Kieser et al 2000). Exconjugants were selected and  
270 maintained on SFM agar plates containing 50  $\mu$ g ml<sup>-1</sup> apramycin. For confocal microscopy,  
271 *Arabidopsis thaliana* Col-0 seeds were germinated as described for plant growth promotion  
272 assays and grown vertically at 22 °C for 9 days under a 12-hour photoperiod. Seedlings were  
273 then transferred to MS (1.5% agar, 0% sucrose) and were allowed to equilibrate for 24 hours

274 before being inoculated with 1µl of spore suspension ( $10^6$  cfu ml<sup>-1</sup>) of either M3 or  
275 *Streptomyces coelicolor* M145 (both eGFP-tagged). Inoculated seedlings were then left to grow  
276 for 3 days before being washed in a 20% (v/v) solution of glycerol containing 1µg ml<sup>-1</sup>  
277 SynaptoRed™ for 10 minutes. A 20 mm section of root (taken from the base of the petiole)  
278 was then mounted onto a slide with 100 µl of the SynaptoRed™/glycerol solution. Samples  
279 were imaged using a Zeiss LSM510 META laser-scanning confocal microscope with a  
280 PlanApochromat 63x (1.4 NA) objective. Green fluorescent protein was excited at 488 nm and  
281 emission collected through a  $527.5 \pm 22.5$  nm bp filter, and FM4-64 excited at 543 nm and  
282 emission collected through a  $587.5 \pm 27.5$  nm bp filter.

283

284 **Plant colonisation assays in soil.** Wild-type *A. thaliana* Col-0, *cpr5*, *pad4*, and *sid2-2* were  
285 obtained from the Nottingham *Arabidopsis* Stock Centre (NASC). Seeds were sterilised and  
286 placed in 500 µl of solutions containing  $10^6$  pregerminated *Streptomyces* spores ml<sup>-1</sup> (either  
287 *Streptomyces coelicolor* M145 or isolate M3, both eGFP-tagged) in 2xYT (Table S2, Kieser et  
288 al 2000). Spores were pre-germinated at 50°C for 10 minutes. 2xYT was used as a control.  
289 Seeds were incubated in the solutions for 90 minutes on a rotating shaker before being  
290 transferred to pots of sieved Levington F2 compost, soaked with dH<sub>2</sub>O. Another 1 ml of pre-  
291 germinated spores (or 2xYT control) was pipetted into the soil to a depth of approximately 2  
292 cm below the seed. Pots were then incubated at 4°C for 24 hours, then grown for 4 weeks under  
293 a photoperiod of 12h light/ 12h dark at 22°C. Six replicate plants were grown for each plant  
294 and streptomycete genotype.

295

296 **Re-isolation of eGFP-tagged bacteria from roots.** Root samples were cleaned as described  
297 above and crushed in 1 ml of sterile 10% (v/v) glycerol. 100 µl of the homogenate was plated  
298 onto three replicate SFM agar plates containing 50 µg ml<sup>-1</sup> apramycin as well as 5 µg ml<sup>-1</sup>  
299 nystatin to inhibit fungal growth. Agar plates were incubated at 30°C for 5 days, then colony  
300 forming units (CFU) were counted. CFU counts were converted to CFU per gram of root tissue  
301 and log-transformed to normalise residuals. Data were analysed via ANOVA and TSD tests.

302

303 **Testing for sole use of carbon and nitrogen sources.** *Streptomyces* strains were streaked onto  
304 minimal medium agar plates (Kieser et al 2000) supplemented with either their preferred  
305 carbon source as a positive control (5 g ml<sup>-1</sup> of either mannitol, maltose or sucrose), 3.875 mM  
306 sodium citrate, or 0.5 mM SA as a carbon source. Plates with no carbon source were used as a

307 control. All plates were incubated for seven days at 30°C. To test for the use of 1-  
308 aminocyclopropane-1-carboxylic acid (ACC) as a sole nitrogen source, strains were streaked  
309 onto Dworkin and Foster medium (Dworkin and Foster 1958) in which 0.2% (w/v) NH<sub>4</sub>SO<sub>4</sub> or  
310 0.051% (w/v) ACC was added as a sole nitrogen source, or no nitrogen source as a control.  
311 Plates were left for 10 days at 30°C before imaging.

312

313 **Salicylic Acid (SA) as a chemoattractant.** 4 µl of *Streptomyces* spores (10<sup>6</sup> spores ml<sup>-1</sup>) were  
314 placed in the centre of SFM agar plates and 40 µl of either 1 mM or 0.5 mM filter sterilised SA  
315 was inoculated onto 6mm filter paper discs (Whatman) and allowed to dry. Discs were then  
316 added to one side of the agar plate, 2 cm from the streptomycete spores. SA solutions were  
317 prepared by diluting a 100 mM stock solution to a 1 mM or 0.5 mM SA solution in PBS. The  
318 100 mM stock solution was made by dissolving 0.138 g of SA in 2 ml of 100% DMSO before  
319 making the solution up to 10 ml with PBS. Thus, the resulting 1 mM and 0.5 mM solutions had  
320 a final concentration of 0.2% and 0.1% DMSO, respectively. To check that any observations  
321 were not due to the effects of DMSO, control plates were also run alongside the SA experiment,  
322 in which discs were soaked in 40 µl of a 0.2% DMSO (in PBS), equivalent to the final  
323 concentration of DMSO in the 1 mM SA solution. Plates were incubated for seven days at 30  
324 °C.

325

326 **Enumeration of bacteria from soil microcosms after exogenous application of salicylic**  
327 **acid.** Levington F2 seed and modular compost (4 ml) was placed into each compartment of a  
328 12-well plate and soaked with 0.5 ml of sterile dH<sub>2</sub>O or 0.5 mM SA. Each well was then  
329 inoculated with 10<sup>7</sup> spores ml<sup>-1</sup> solution of either eGFP-tagged M145 or M3, suspended in  
330 dH<sub>2</sub>O or 0.5 mM SA. Spores of eGFP-tagged M3 or M145 were used to align with the *in vivo*  
331 plant colonisation experiments. There were nine replicate wells for each treatment. Well-plates  
332 were placed under a photoperiod of 12 h light/12 h dark for 10 days. 100 mg of soil from each  
333 well was then diluted in 900 µl of water and vortexed. Serial dilutions were then plated onto  
334 SFM containing 50 µg ml<sup>-1</sup> apramycin (for selection), 10 µg ml<sup>-1</sup> nystatin, and 100 µg ml<sup>-1</sup>  
335 cyclohexamide (to repress fungal growth). CFU of the *Streptomyces* inoculum were then  
336 enumerated on the 10<sup>-2</sup> dilution plates after 4 days to assess whether SA affected growth in  
337 soil.

338

339 **Results**

340

341 **Bacterial 16S rRNA gene profiling of the *A. thaliana* rhizosphere and endosphere.** Several  
342 independent studies have reported that *A. thaliana* plants have relatively stable and consistent  
343 root bacterial communities, with the enrichment of Actinobacteria within plant roots being  
344 predominantly driven by the presence of the family Streptomyetaceae (Bai et al 2015,  
345 Bodenhausen et al 2013, Bulgarelli et al 2012, Carvalhais et al 2015, Lebeis et al 2015,  
346 Lundberg et al 2012, Schlaeppli et al 2014). To test this on plants grown in our laboratory, we  
347 repeated the bacterial 16S rRNA gene profiling using the universal primers PRK341 and  
348 MPRK806 (Yu et al 2005) and found the results were in agreement with published studies, in  
349 that Streptomyetaceae were the most abundant family of Actinobacteria found in the both the  
350 rhizosphere and endophytic compartments (Fig. 1). Although they were not significantly  
351 enriched in either compartment compared to the surrounding soil, Streptomyetaceae made up  
352 5.62% ( $\pm$  1.10% standard deviation) of the rhizosphere community and 1.12% ( $\pm$  0.50%) of  
353 the endophytic community; Actinobacteria as a whole made up 15.15% ( $\pm$  1.47%) and 2.87%  
354 ( $\pm$  0.88%) of these compartments, respectively (Fig. 1 and S1).

355

356 **Figure 1.** The relative abundance of Actinobacterial families in soil, rhizosphere and root  
357 compartments. N = 3 replicate plants in individual pots. Streptomyetaceae was the most  
358 abundant family of Actinobacteria in all three compartments. Clustering represents Bray Curtis  
359 dissimilarities.

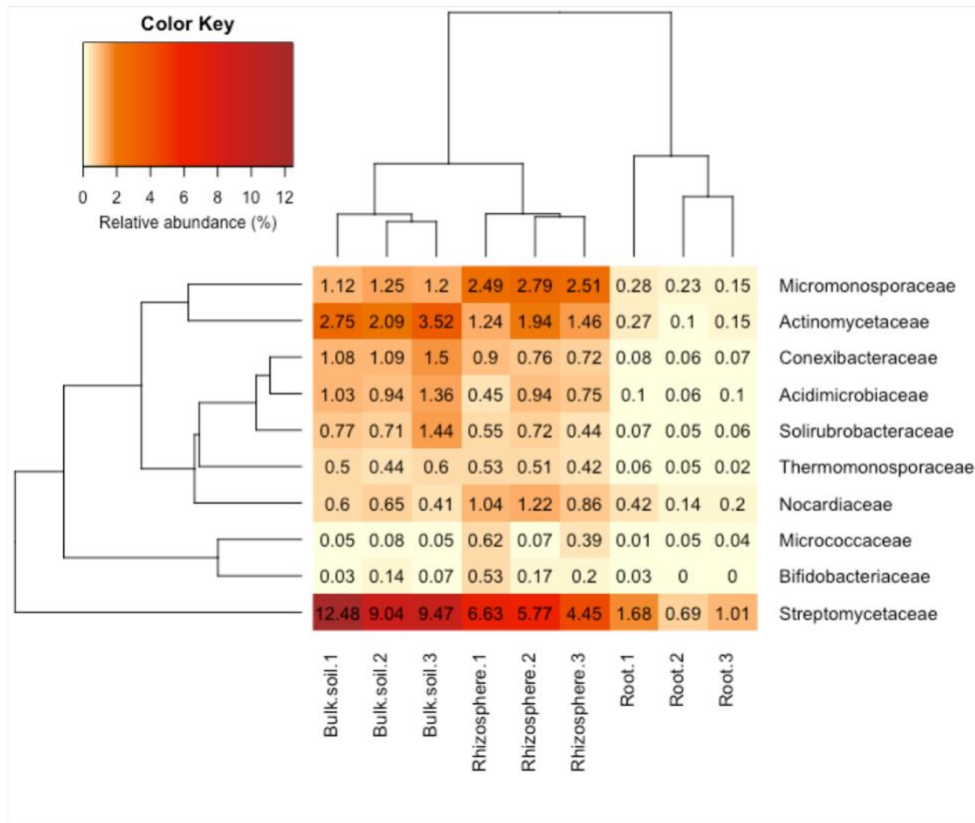

360

361

362

363

364

365

366

367

368

369

370

371

372

373

374

375

376

377

**DNA Stable Isotope Probing of the *A. thaliana* rhizosphere and endosphere.** To identify which bacteria feed on root exudates in the rhizo- and endosphere of *A. thaliana*, plants were labelled by growing them (n=3) for 21 days under a short-day photoperiod (8 hours light) in the presence of  $^{12}\text{CO}_2$  or  $^{13}\text{CO}_2$  in sealed growth chambers (Fig. S2). Unplanted pots were also incubated with  $^{13}\text{CO}_2$  to control for autotrophic metabolism. Given the relatively short time frame of  $\text{CO}_2$  exposure, the  $^{13}\text{C}$  was expected to be incorporated mainly into plant metabolites rather than into plant cell wall material. Bacteria that incorporate  $^{13}\text{C}$  into their DNA are therefore likely to be feeding on exuded plant metabolites or directly fixing  $^{13}\text{CO}_2$  autotrophically. After 21 days, total DNA was extracted from the unplanted soil, rhizosphere, and endosphere compartments of the  $^{12}\text{CO}_2$  or  $^{13}\text{CO}_2$  incubated plants, and the heavy ( $^{13}\text{C}$ ) and light ( $^{12}\text{C}$ ) DNA were separated by density gradient ultracentrifugation for the rhizosphere and endosphere compartments (Neufeld et al 2007). Heavy and light fractions of the gradient were used for 16S rRNA gene amplicon sequencing using the universal bacterial 16S rRNA primers PRK341 and MPRK806. For the rhizosphere and endophytic samples, bacterial genera were defined as metabolisers of root exudates if they showed at least a two-fold increase in relative abundance in the heavy fraction of  $^{13}\text{CO}_2$  plants ( $^{13}\text{CH}$ ) compared to both the  $^{13}\text{CO}_2$  light fraction ( $^{13}\text{CL}$ ) and  $^{12}\text{CO}_2$  heavy fraction ( $^{12}\text{CH}$ ), respectively. Importantly, the abundance of

378 these bacteria was also less than two-fold greater in the heavy versus the light fractions of  
379  $^{13}\text{CO}_2$  unplanted controls which means they are not autotrophically fixing  $\text{CO}_2$ .

380 Following sorting of the data and the removal of autotrophs (Table S5), 28 genera  
381 showed an average of two-fold (or more) enrichment in the  $^{13}\text{CH}$  fraction of rhizosphere  
382 samples (Fig S3, Table S5). The majority of these taxa were in the phylum Proteobacteria (24  
383 out of 28 genera), with only one representative each from the phyla Chloroflexi (*Levilinea*),  
384 Firmicutes (*Pelotomaculum*), Cyanobacteria (*Chroococcidiopsis*), and the Planctomycetes  
385 (*Pirellula*). The most enriched genus was *Pseudomonas*, which demonstrated a 64-fold  
386 enrichment in relative abundance between the  $^{13}\text{CH}$  (8.63% average relative abundance) and  
387  $^{13}\text{CL}$  (0.13% average relative abundance) fractions and a 23-fold enrichment between the  $^{13}\text{CH}$   
388 fraction compared to the  $^{12}\text{CH}$  control (0.37% relative abundance). A total of 27 genera  
389 demonstrated enrichment in the  $^{13}\text{CH}$  fraction of the endophytic compartment (Fig 2, Table  
390 S5). Here, the majority of root exudate metabolisers were also Proteobacteria (21 genera in  
391 total), with three genera belonging to the phylum Planctomycetes (*Blastopirellula*, *Pirellula*  
392 and *Gemmata*), one to the Firmicutes (*Clostridium*), one to the Chloroflexi (*Chloroflexus*), and  
393 one to the Actinobacteria (*Jatrophihabitans*). The most abundant genus in the  $^{13}\text{CH}$  fraction of  
394 the endophytic samples was *Shinella*, which demonstrated a 38-fold enrichment between the  
395  $^{13}\text{CH}$  (26.42% relative abundance) and  $^{13}\text{CL}$  (0.68% relative abundance) fractions and a 23-  
396 fold enrichment between the  $^{13}\text{CH}$  and the  $^{12}\text{CH}$  control fractions (1.14%). In terms of fold  
397 change, however, *Pseudomonas* was the most enriched genus with a 26-fold increase in  
398 abundance between  $^{13}\text{CH}$  (15.64% relative abundance) and  $^{13}\text{CL}$  (0.59% relative abundance)  
399 fractions of  $^{13}\text{CO}_2$  incubated plants (Fig 2). 15 out of the 28 genera were found to be  
400 metabolising exudates in the endosphere but not the rhizosphere, whereas 16 out of 29 genera  
401 were metabolising exudates in the rhizosphere but not the endosphere. The remaining 13 genera  
402 were enriched in the heavy fractions of both the endophytic and rhizospheric compartments,  
403 suggesting that they are able to survive and make use of plant metabolites in both of these  
404 niches (Table S5).

405

406 **Figure 2.** Eight genera of bacteria isolated from the endophytic compartment of *Arabidopsis*  
407 *thaliana* plants whose relative abundance demonstrated the greatest overall enrichment  
408 between the  $^{13}\text{CH}$  fraction and the  $^{12}\text{CH}$  fraction due to the metabolism of  $^{13}\text{C}$  labelled root  
409 exudates. In comparison, the genus *Streptomyces* did not demonstrate enrichment between  
410 these fractions suggesting they did not metabolise labelled root exudates.  $^{12}\text{CL}/^{13}\text{CL}$  and  
411  $^{12}\text{CH}/^{13}\text{CH}$  are the buoyant density fractions representing the light/unlabelled (L) and

412 heavy/labelled (H) fractions of DNA from  $^{12}\text{CO}_2$  (12C) or  $^{13}\text{CO}_2$  ( $^{13}\text{C}$ ) incubated plants  
413 respectively.

414

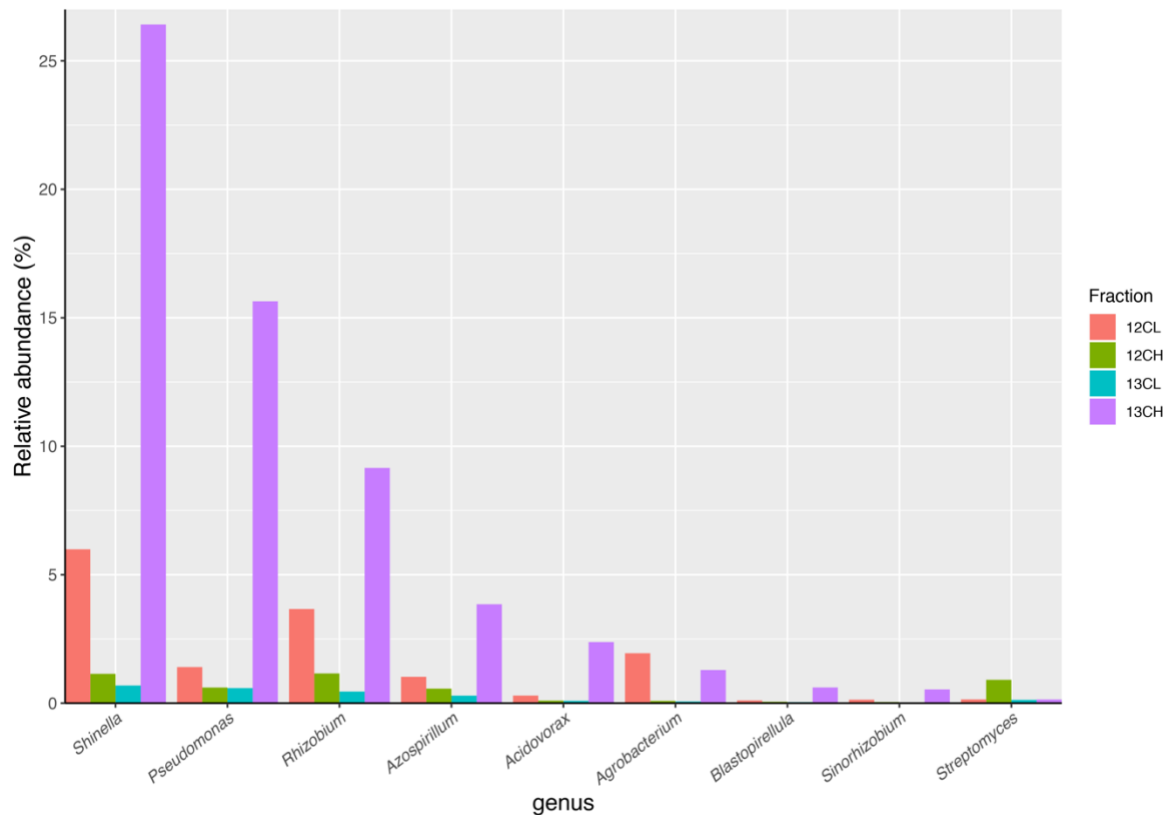

415

416 Surprisingly, there was no enrichment of *Streptomyces* bacteria in the  $^{13}\text{CH}$  fractions of either  
417 the rhizosphere or endosphere, despite being the most dominant member of the phylum  
418 Actinobacteria in both compartments (Figs 1, 2 and S3). Taken together, these data suggest  
419 that, in soil, *Streptomyces* bacteria were outcompeted for the root exudates by unicellular  
420 bacteria, particularly Proteobacteria, under the conditions used in this experiment. In the  
421 current study, Proteobacteria were very abundant in the unfractionated soil (35% average  
422 relative abundance), rhizosphere (39%) and endophytic compartment (91%), compared to  
423 Actinobacteria (present at 20%, 15% and 3% in the soil, rhizosphere and root compartments,  
424 respectively) (Fig S1) and were therefore likely to have the upper hand at the outset of  
425 competition (Scheuring and Yu 2012). Accordingly, genera that were found to be metabolising  
426 the greatest amount of exudates in the roots were also found to be enriched in the endophytic  
427 compartment compared to the surrounding soil (Fig S4). Given their diverse metabolic  
428 capabilities, it is likely that streptomycetes are able to persist at low abundance by feeding on  
429 more complex organic polymers that contained a much lower level of labelled  $^{13}\text{C}$ , under  
430 conditions of high competition or in the absence of a preferred type of exudate. *Arabidopsis*

431 *thaliana* has also been shown to have a relatively small “rhizosphere effect” compared to other  
432 plant species (Bulgarelli et al 2015, Schlaeppli et al 2014), with weak differentiation in terms  
433 of microenvironment and community composition between the rhizosphere and bulk soil.  
434 Therefore, complex polymers may have been more readily available in the rhizosphere than  
435 exudates, particularly given the fact that compost (used as the plant growth medium in this  
436 experiment) contains a high level of organic matter. Alternatively, as they also have spore-  
437 forming capabilities, it is possible that *Streptomyces* species were mostly dormant in the  
438 rhizosphere and endosphere when the plants were being pulse-labelled with  $^{13}\text{CO}_2$ .

439

440 **Isolation and genome sequencing of *Streptomyces* endophyte strains.** To analyse plant root  
441 interactions with *Streptomyces* species, we selectively isolated these bacteria from *A. thaliana*  
442 roots and generated high-quality genome sequences for five phylogenetically distinct  
443 *Streptomyces* strains, as judged by initial 16S rRNA gene amplification and sequencing. We  
444 also generated high-quality genome sequences for three known endophyte strains (Table 1).  
445 These are *Streptomyces lydicus* isolated from the commercial plant growth-promoting product  
446 Actinovate and two additional *S. lydicus* strains (ATCC25470 and ATCC31975) obtained from  
447 the American Type Culture Collection (Tokala et al 2002). We submitted the genome  
448 sequences of all nine strains to the antiSMASH 4.0 server which predicts secondary metabolite  
449 biosynthetic gene clusters (Weber et al 2015). The results predicted that all nine strains encode  
450 siderophores, antifungal and antibacterial natural products, all of which are common in this  
451 genus. To test their bioactivities, agar plate bioassays were performed and showed that all the  
452 *Streptomyces* strains inhibited the growth of at least one pathogenic microorganism while  
453 some, such as strain N2, show broad spectrum antifungal and antibacterial activity, including  
454 against the Gram-negative bacterium, *E. coli* (Table S4).

455

456

457

458 **Table 1.** Features of the *Streptomyces* endophyte genomes sequenced for this study.  
459 Biosynthetic gene clusters (BGCs) were predicted using antiSMASH 4.0.

| Strain | Accession no. | Genome size (bp) | ORFs | tRNAs | rRNAs | BGCs |
|--------|---------------|------------------|------|-------|-------|------|
| L2     | QBDT00000000  | 8,073,926        | 7079 | 68    | 18    | 32   |
| M2     | CP028834      | 8,718,751        | 8026 | 72    | 18    | 24   |



|            |               |           |      |    |    |    |
|------------|---------------|-----------|------|----|----|----|
| M3         | QANR000000000 | 8,304,843 | 7561 | 74 | 18 | 28 |
| N1         | QBDS000000000 | 7,207,104 | 6239 | 65 | 21 | 22 |
| N2         | CP028719      | 8,428,700 | 7401 | 69 | 21 | 35 |
| Actinovate | RDTC000000000 | 9,139,876 | 7989 | 67 | 21 | 36 |
| ATCC25470  | RDTD000000000 | 7,935,716 | 7084 | 65 | 21 | 26 |
| ATCC31975  | RDTE000000000 | 9,244,118 | 8128 | 66 | 21 | 34 |

460

461 Some plant growth-promoting bacteria are capable of producing plant phytohormones and  
462 KEGG pathway analysis revealed that the genomes of all our sequenced *Streptomyces* strains  
463 possess genes encoding proteins involved in the biosynthesis of indole-3-acetic acid (IAA),  
464 which can contribute to shoot and root growth (Remans et al 2006) (Table S6). For example,  
465 all strains have genes encoding key proteins involved in the indole-3-acetamide (IAM)  
466 pathway, whereby tryptophan is converted to IAM via a tryptophan 2-monooxygenase enzyme  
467 (KEGG reaction R00679). IAM is then further converted to IAA through the action of an  
468 amidase enzyme (KEGG reaction R03096). Several strains also possessed genes encoding  
469 enzymes involved in the tryptamine (TAM) pathway, which converts tryptamine to IAA via an  
470 amine oxidase enzyme (R02173) and an acetaldehyde oxidase enzyme (R02681). *In vitro*  
471 colorimetric assays using Salkowski's reagent (Bric et al 1991) qualitatively confirmed the  
472 ability of all strains to make IAA (Fig. S5).

473 In addition to IAA, the genomes of all streptomycete isolates possess up to two copies  
474 of genes encoding the enzyme aminocyclopropane-1-carboxylate (ACC) deaminase. This  
475 cleaves ACC, which is the direct precursor for the plant phytohormone ethylene, into ammonia  
476 and 2-oxobutanoate, Kegg reaction: R00997 (Table S6). Bacteria can use the products of this  
477 reaction as a nitrogen source, and it was demonstrated *in vitro* that all of the isolates were  
478 capable of utilising ACC as a sole nitrogen source when added to minimal medium (Fig. S6).  
479 There is evidence that the activity of this enzyme can reduce damage and early-onset  
480 senescence caused by excessive ethylene production under prolonged periods of plant stress,  
481 by removing the substrate for ethylene biosynthesis (Glick 2014, Palaniyandi et al 2014, Yang  
482 et al 2009).

483

484 **Not all *Streptomyces* strains have growth promoting effects in *A. thaliana*.** To investigate  
485 whether the sequenced *Streptomyces* strains promote plant growth and fitness, we established  
486 root infection assays in which seeds were coated with a suspension of pre-germinated

487 *Streptomyces* spores - these were also added to the soil growth substrate. Tagging the strains  
488 with eGFP and the apramycin resistance (*aac*) gene allowed visual confirmation of root  
489 infection using confocal microscopy (Fig. 3) and selective re-isolation of the strains on agar  
490 plates containing apramycin.

491

492 **Figure 3.** Confocal Laser Scanning Microscopy images of *Arabidopsis thaliana* rhizoplane  
493 colonisation by eGFP-tagged *Streptomyces* strains three days after inoculation. A and B show  
494 *A. thaliana* roots (red) colonised by eGFP-tagged *Streptomyces coelicolor* M145 (green) and  
495 images C and D show *A. thaliana* roots (red) colonised by eGFP-tagged *Streptomyces*  
496 endophyte strain M3 (green).

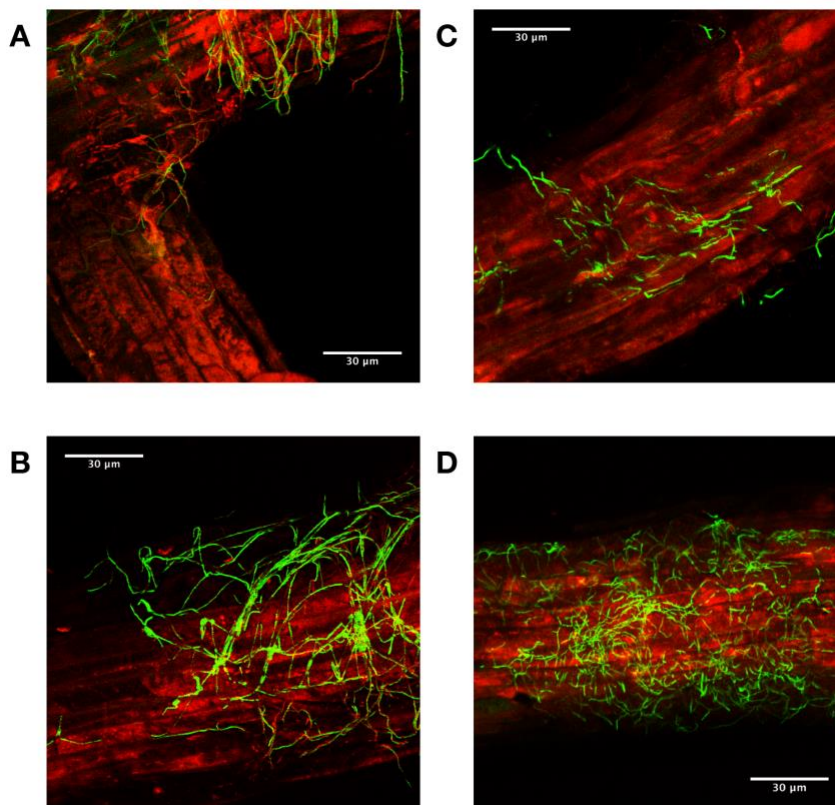

497

498 We tested all the genome-sequenced stains from this study alongside the model organism *S.*  
499 *coelicolor* M145. All strains were able to colonise plant roots with varying efficiencies, and  
500 several of them significantly increased plant biomass *in vitro* (Fig. 4). However, not all of them  
501 promoted plant growth; application of *Streptomyces* strains N1 and N2 significantly reduced  
502 the growth of *A. thaliana* ( $P < 0.05$  in Tukey's HSD, Fig. 4) and in some cases led to a  
503 senescence phenotype with leaf browning; it is possible that some of the biosynthetic gene

504 clusters which have a low percentage homology to other known secondary metabolite clusters,  
505 may encode novel herbicidal compounds in these strains.

506

507 **Figure 4.** The impact of *Streptomyces* isolates on *A. thaliana* biomass (grams) 16 days after  
508 inoculation. \* represents a significant difference in biomass relative to sterile control plants ( $P$   
509  $<0.05$ ).

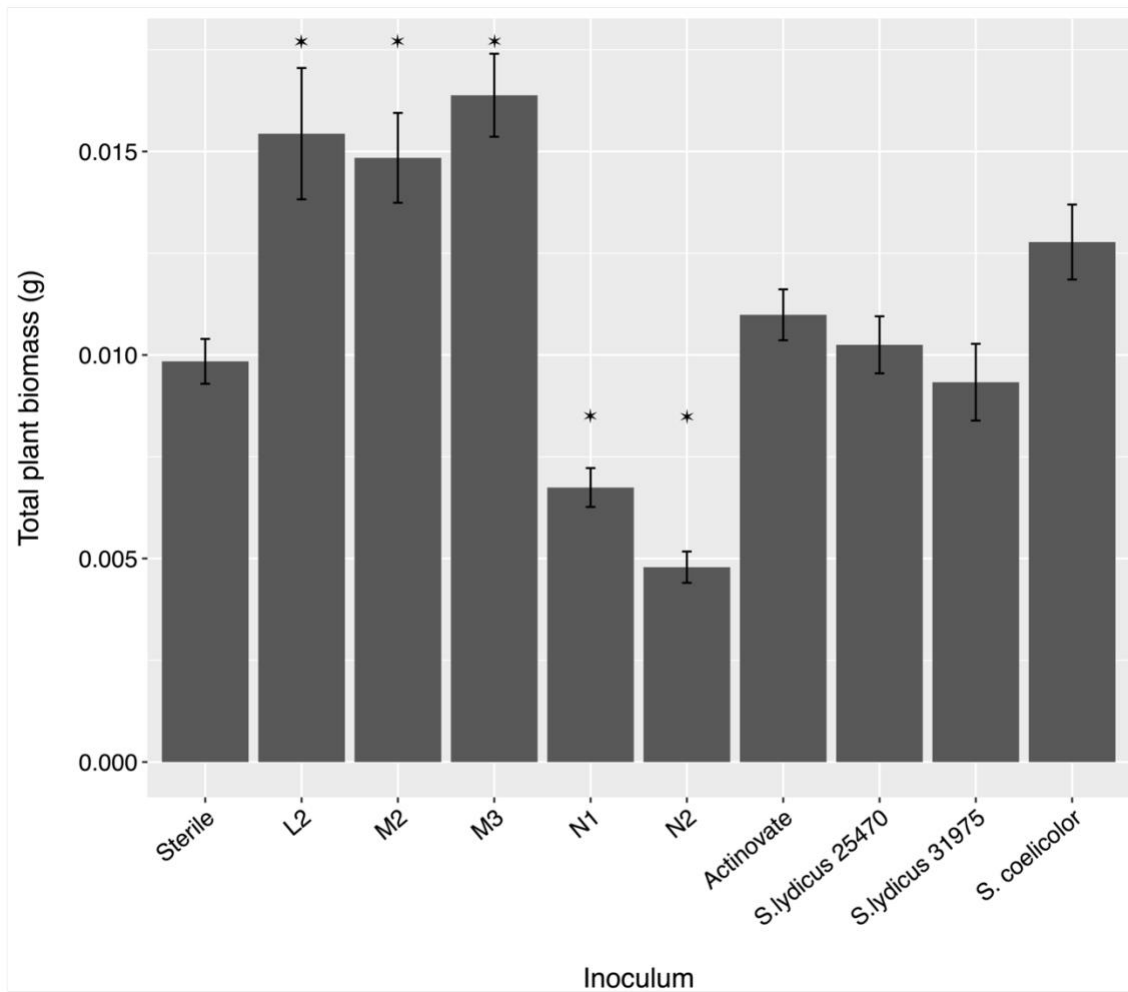

510

511 **Root exudates promote the growth of *Streptomyces* endophytes *in vitro* but not *in vivo*.**

512 Plants are known to use their root exudates to recruit bacteria from the soil, and these exudates  
513 include a complex mixture of sugars, amino acids and phytohormones, including jasmonic acid  
514 (JA) and salicylic acid (SA). However, our DNA-SIP experiments suggested that *Streptomyces*  
515 species were not feeding on these root exudates in soil-grown plants (Figs 2 and S3). To test  
516 whether streptomycetes could use root exudates when grown in monoculture, we collected  
517 exudates from hydroponically-grown wild-type *A. thaliana* plants and grew *Streptomyces*  
518 isolates on agarose plates containing water only, or water plus sterile root exudates. None of

519 the strains grew on agarose alone, but all grew on agarose plates containing root exudates (Fig.  
520 5).

521

522 **Figure 5.** *Streptomyces* strains grown on agarose dissolved in sterile water or agarose dissolved  
523 in filter sterilised *A. thaliana* root exudates. Strains M2, M3, N1, N2, and L2 are the  
524 *Streptomyces* endophytes isolated and genome sequenced in this study. The other strains are *S.*  
525 *lydicus* isolated from Actinovate, *S. lydicus* ATCC25470 and the model laboratory strain *S.*  
526 *coelicolor* M145.

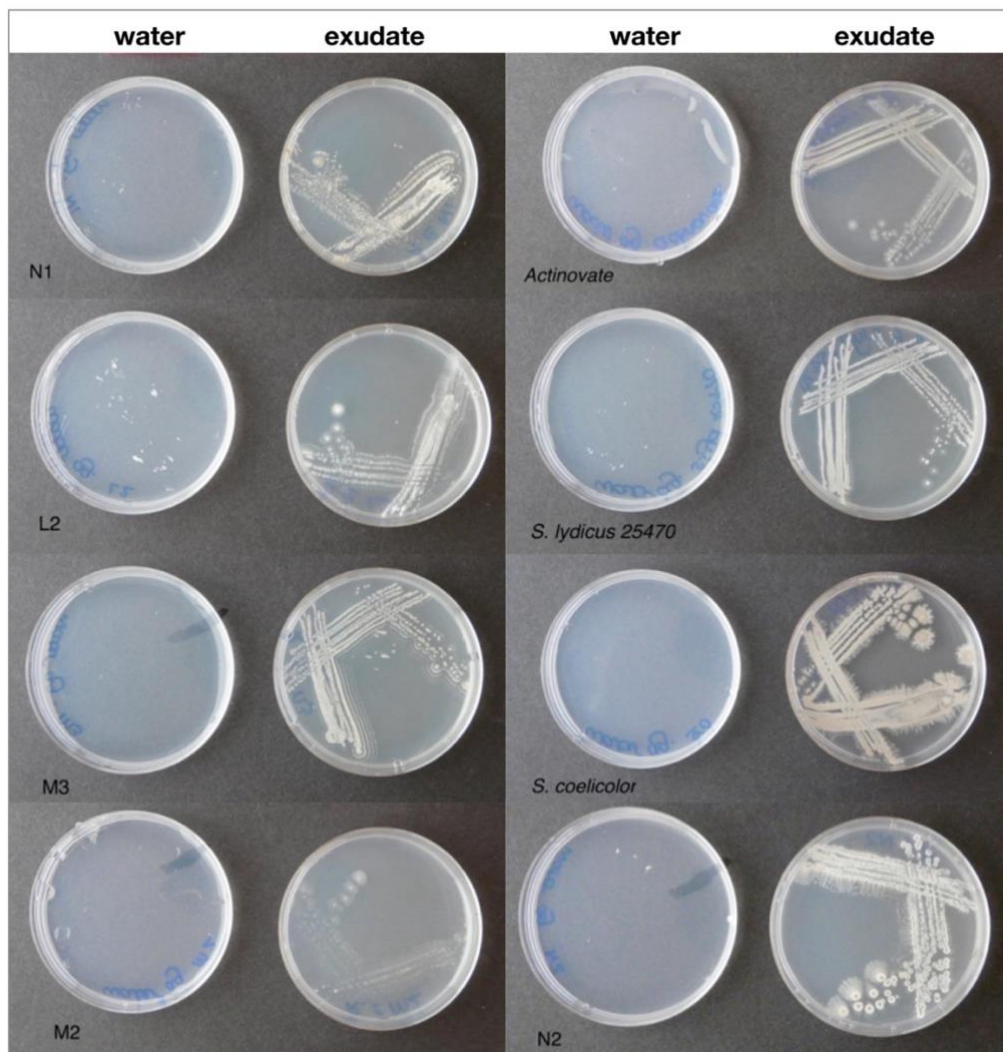

527

528 **Streptomyces do not feed on salicylic acid.** Previous studies have suggested that the  
529 defence phytohormone SA plays a key role in modulating root microbiome assembly in *A.*  
530 *thaliana*, particularly in recruiting streptomycetes, and that a *Streptomyces* endophyte strain  
531 isolated from *A. thaliana* roots could grow using SA as a sole carbon source (Lebeis et al 2015).  
532 To test this, we first compared root colonisation efficiency by *S. coelicolor* M145 and  
533 *Streptomyces* M3 in wild-type *A. thaliana* col-0, *cpr5* mutant plants that constitutively produce

534 SA, and in *pad4* and *sid2-2* plants that are deficient in SA production (Bowling et al 1994,  
535 Jirage et al 1999, Wildermuth et al 2001, Zhou et al 1998). The results confirmed that root  
536 colonisation (measured by counting CFU returned per gram of plant root) was significantly  
537 affected by plant genotype, irrespective of the *Streptomyces* strain used as an inoculum (plant  
538 genotype on log-transformed CFU g<sup>-1</sup> was  $P < 0.01$ , strain genotype interaction was  $P = 0.67$   
539 in an anova test). Specifically, the colonisation of both M145 and M3 was significantly  
540 increased in *cpr5* mutant plants (Fig. 6), which constitutively make SA, compared to the other  
541 three genotypes ( $P < 0.05$  in all Tukey's HSD tests between *cpr5* and other plant genotypes).

542

543 **Figure 6.** Increased root colonisation of *Arabidopsis thaliana cpr5* plants (constitutively  
544 expressing salicylic acid) by *Streptomyces* strains compared to *pad4* and *sid2-2* plants  
545 (deficient in salicylic acid production) and wild-type Col-0 plants. Root colonisation was  
546 measured as the average colony forming units ( $\pm$ SE) of *Streptomyces*, per gram of root, that  
547 could be re-isolated from plants 4 weeks after germination.  $N = 6$  plants per treatment.

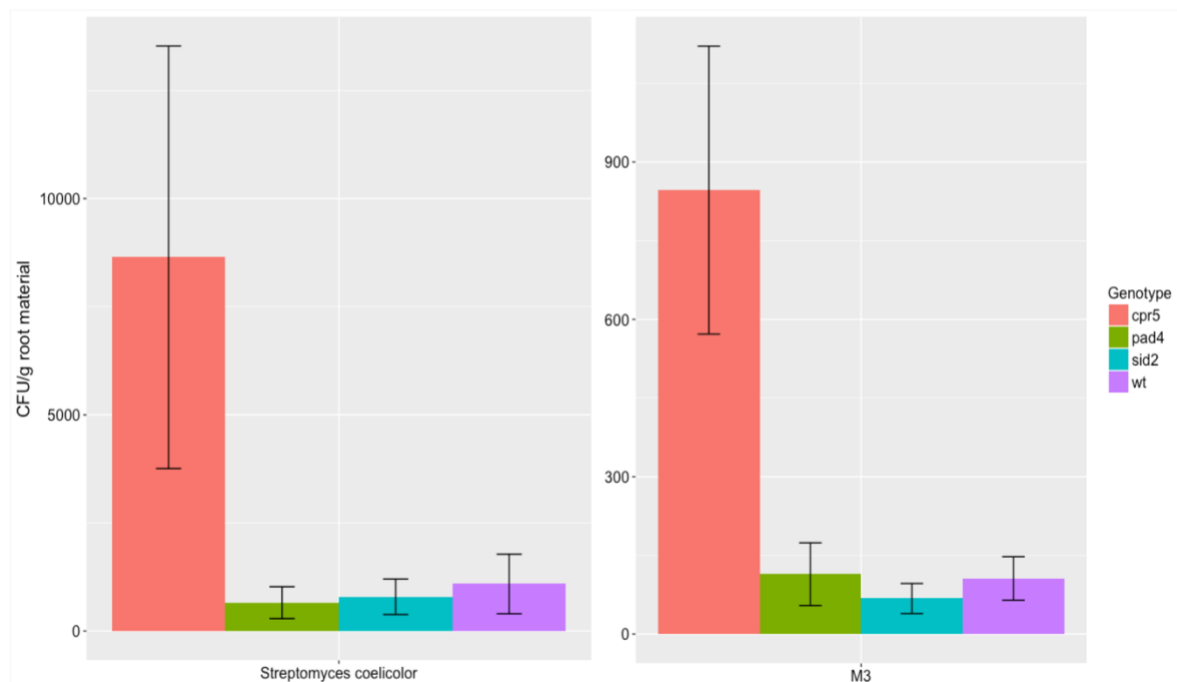

548

549 However, we observed no significant difference between the wild-type, *pad4*, or *sid2-2* plants  
550 (Fig. 6). We note that the *cpr5* gene (deleted in *cpr5* plants) has a complex role in regulating  
551 plant growth, immunity, and senescence (Jing et al 2007). The *cpr5* plants demonstrated weak  
552 growth compared to the other genotypes (Fig. S7), giving rise to the possibility that the  
553 observed increase in streptomycete colonisation was due to the complex phenotype of the *cpr5*

554 mutant plants and not necessarily the higher levels of SA produced by these plants (Jing et al  
555 2008).

556 In order to test whether SA could be directly used as a chemoattractant by *Streptomyces*  
557 species, we grew all of the sequenced streptomycete strains next to paper disks soaked in either  
558 0.5 mM SA, 1 mM SA, or 0.1% (v/v) DMSO (a control for the solvent) but observed no obvious  
559 growth towards SA after 10 days. (Fig. S8). We then reasoned that altered exudate SA levels  
560 might indirectly benefit streptomycetes by negatively modulating the levels of the other  
561 rhizobacteria in the soil. We tested this by establishing soil microcosms in deep 12 well plates,  
562 which were then wetted with either sterile water or 0.5 mM SA. Microcosms were inoculated  
563 with spores of M145, M3, or left as uninoculated controls. Nine replicates of each wetting  
564 treatment were run in parallel for each strain and the control. Strains were recovered on  
565 apramycin-containing selective agar medium after 10 days. A GLM with a negative binomial  
566 distribution was used to model the effect of strain (M145 or M3), soil treatment (SA or water),  
567 and their interaction on bacterial CFU returned from soil wells. Although there was overall a  
568 significantly greater number of CFU of M145 recovered from soil wells than for the M3 strain  
569 ( $P < 0.01$ ), there was no significant effect of soil treatment ( $P = 0.67$ ) on CFU number. The  
570 interaction term was also insignificant ( $P = 0.20$ ), indicating that this did not differ between  
571 the two inoculated strains (Fig. 7). This suggested that neither strain had a competitive  
572 advantage when greater concentrations of SA were present.

573 The simplest explanation of these results is that SA does not specifically attract  
574 streptomycetes to the rhizosphere of *A. thaliana*. This does not necessarily contradict the  
575 previously published observation (in Lebeis et al 2015) that SA is being used as a carbon source  
576 by streptomycetes, as this has been demonstrated before in another streptomycete isolate  
577 (Ishiyama et al 2004). However, we observe that the supplementary methods of this paper state  
578 that the minimal medium agar with 0.5 mM SA that was used to grow *Streptomyces* sp. 303  
579 also contained 1 g L<sup>-1</sup> (3.875 mM) sodium citrate, which is an additional candidate source of  
580 carbon and energy. To test this, we grew all the genome-sequenced strains from our study on  
581 minimal medium (MM) agar and MM agar containing 0.5mM SA, 3.875 mM sodium citrate,  
582 or their preferred carbon source (either 5 gL<sup>-1</sup> mannitol, maltose or sucrose). All the strains  
583 grew well on their preferred carbon source and most strains also grew on sodium-citrate-  
584 containing plates, but we observed no growth on MM agar with or without SA (Fig. S9). Our  
585 results suggest that SA is not used as a carbon source by the bacteria used in our study, and this  
586 is additionally supported by the absence of known SA degradation genes in the genomes of all  
587 the sequenced isolates (Table S3).

588

589 **Figure 7.** Number of colony forming units (CFU) of inoculated strains returned from soil  
590 microcosms treated with either SA or dH<sub>2</sub>O after 10 days. Microcosms were inoculated with  
591 spores of either *S. coelicolor* (*S.co*), M3 or left uninoculated as a control. *N* = 9 microcosms  
592 per treatment.

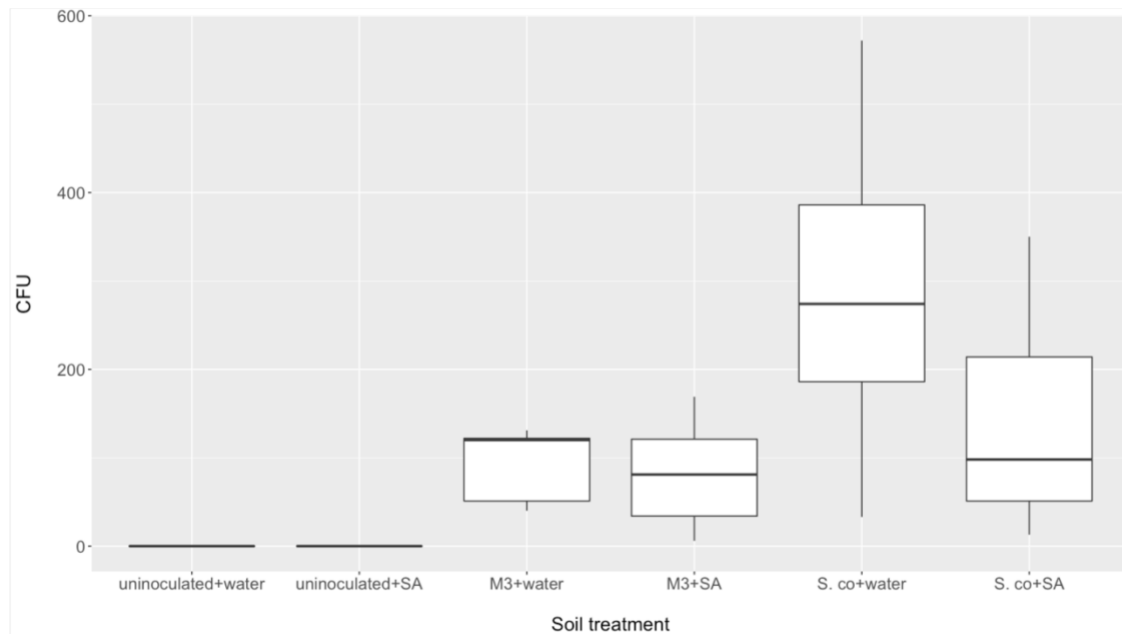

593

594 Taking these results together, we conclude that the observed increase in colonisation by  
595 streptomycetes in *cpr5* mutant plants was likely due to a pleiotropic effect of plant genotype  
596 rather than the presence of SA. This is consistent with the observation that there was no effect  
597 of attenuated SA production in the *pad4* and *sid2-2* plants on colonisation, and the observation  
598 that *cpr5* plants have been noted to undergo early senescence and overproduce reactive oxygen  
599 species (Jing et al 2007, Jing et al 2008, Kirik et al 2001). Overall, we found no evidence to  
600 support the hypothesis that SA specifically attracts streptomycetes to *A. thaliana* roots, but  
601 rather they may have better access to the roots of senescing *cpr5* plants due to their saprotrophic  
602 and filamentous lifestyle.

603

#### 604 **Discussion.**

605 Here we used DNA-SIP to identify the bacteria feeding on exudates in the *A. thaliana*  
606 rhizosphere and endosphere. To our knowledge, this is the first report of DNA-SIP on the  
607 endosphere compartment of *A. thaliana*. The role of Proteobacteria and Firmicutes have  
608 previously been investigated in the rhizosphere, however this was using DNA-SIP combined  
609 with a Denaturing Gradient Gel Electrophoresis approach instead of with 16S rRNA amplicon

610 sequencing (Haichar et al 2012). Our results, combined with previous published reports on the  
611 chemistry of *A. thaliana* exudates, suggest that root exudates are a rich and public food resource  
612 (Badri and Vivanco 2009, Bais et al 2006, Haichar et al 2012). That is, many different genera  
613 of bacteria appear to be able to use root exudates as a carbon source, as they contain a diverse  
614 range of widely used metabolites including sugars, amino acids, and phenolic compounds  
615 (Badri and Vivanco 2009, Chaparro et al 2013). In our study, bacteria that could metabolise  
616 root exudates were those that have previously been noted for their positive influence on plant  
617 fitness and were enriched in the endophytic compartment. For example, members of the genus  
618 *Pseudomonas* are known to produce many bioactive and growth-promoting molecules (Glick  
619 et al 1997, Hernández-León et al 2015, Mercado-Blanco et al 2016, Raza et al 2016), and  
620 *Rhizobia* have been shown to have a positive effect on root development and plant biomass in  
621 *Arabidopsis thaliana* (Zhao et al 2017). We hypothesise that this apparent mutualism between  
622 plant and bacteria is evolutionarily stabilised via a Partner Fidelity Feedback mechanism  
623 (Foster and Wenseleers 2006, Weyl et al 2010). Bacterial colonies that release growth-  
624 promoting factors and/or antibiotics exploit a widespread pre-adaptation in plants to proliferate  
625 root biomass in nutrient-rich or disease-free soils. In return, plant root masses release food  
626 resources for bacteria which promote the local colony growth. Root-derived resources are also  
627 likely to fuel interference competition amongst microbes, with the priority advantage given to  
628 the most abundant strains. In our SIP experiment, these were the proteobacterial genera  
629 (Scheuring and Yu 2012). Interference competition amongst bacteria typically manifests as  
630 competitive exclusion by taking up niche space, plus the secretion of antibacterials and  
631 antifungals, the latter of which may indirectly benefit the plant by inhibiting the growth of  
632 pathogens.

633         However, such interactions can be dynamic over time since the composition of plant  
634 root exudates is known to fluctuate considerably over the plant life cycle. The abundance of  
635 particular microbial taxa has been shown to correlate with these changes, suggesting some  
636 specificity in exudate usage (Chaparro et al 2013, Chaparro et al 2014, Haichar et al 2012,  
637 Zhalnina et al 2018). Interestingly streptomycetes, the main focus of our study, did not feed off  
638 root exudates in our SIP experiment despite being able to grow on purified root exudates *in*  
639 *vitro*. *Streptomyces* were still present at low abundance in the endosphere and rhizosphere,  
640 suggesting that their preferred substrates might have been absent from root exudates at the time  
641 of <sup>13</sup>C labelling, or that they were largely out-competed by the more abundant proteobacterial  
642 genera. *Streptomyces* are spore-formers and thus may enter a dormant phase in their lifecycle  
643 under unfavourable conditions (van der Meij et al 2017). As such, they may have been



644 detectable via their DNA, but dormant, under conditions in the root and rhizosphere at the time  
645 of sampling. It should also be noted that *Streptomyces* are effective saprophytes, and so it is  
646 possible that they feed off older, plant-originated organic material that had been sloughed off  
647 before the <sup>13</sup>C labelling SIP experiment or on similar matter in the compost growth medium.

648 Our study shows that *Streptomyces* strains isolated from *A. thaliana* plant roots encode  
649 an array of plant beneficial traits, including those involved in plant-growth promotion and  
650 protection against infection. If such strains are to be used successfully as biocontrol and  
651 growth-promoting agents, the next challenge is to determine how to ensure consistent  
652 establishment in the rhizosphere and endosphere and how to promote the activity of these  
653 strains within the plant root microbiome. Previous studies have suggested that phenolic  
654 compounds, particularly SA, can directly affect the abundance of streptomycetes in the root  
655 microbiome (Lebeis et al 2015). However, such studies have made use of *Arabidopsis* lines,  
656 such as *cpr5* plants, that have mutations in key regulatory pathways. We suggest that such  
657 mutations result in pleiotropic effects that make it difficult to determine causal relationships  
658 between any given compound and bacterial colonisation. Thus, a more targeted approach is  
659 required to determine if particular exudates, in addition to the initial abundance of strains in  
660 the starting soil inoculum, are important for recruiting a higher abundance of *Streptomyces*  
661 species to plant roots.

662 **Acknowledgments.** SFW was funded by a Natural Environment Research Council (NERC)  
663 PhD studentship (NERC Doctoral Training Programme grant NE/L002582/1). MCM and JTN  
664 were funded by Biotechnology and Biological Sciences Research Council (BBSRC) PhD  
665 studentships (BBSRC Doctoral Training Program grant BB/M011216/1). Elaine Patrick was  
666 supported by NERC grant NE/M015033/1 awarded to DWY, BW, JCM and MIH. This work  
667 was also supported by the Norwich Research Park (NRP) through a Science Links Seed Corn  
668 grant to MIH and JCM and by the NRP Earth and Life Systems Alliance (ELSA).

669 **Conflicts of interest.** The authors declare no conflicts of interest.

## 670 **References**

671 Aziz RK, Bartels D, Best AA, DeJongh M, Disz T, Edwards RA *et al* (2008). The RAST  
672 Server: rapid annotations using subsystems technology. *BMC Genomics* **9**: 75.

673  
674 Badri DV, Vivanco JM (2009). Regulation and function of root exudates. *Plant, Cell &*  
675 *Environment* **32**: 666-681.

676

- 677 Badri DV, Chaparro JM, Zhang R, Shen Q, Vivanco JM (2013). Application of natural  
678 blends of phytochemicals derived from the root exudates of *Arabidopsis* to the soil reveal that  
679 phenolic-related compounds predominantly modulate the soil microbiome. *Journal of*  
680 *Biological Chemistry* **288**: 4502-4512.
- 681  
682 Bai Y, Muller DB, Srinivas G, Garrido-Oter R, Potthoff E, Rott M *et al* (2015). Functional  
683 overlap of the *Arabidopsis* leaf and root microbiota. *Nature* **528**: 364-369.
- 684  
685 Bais HP, Weir TL, Perry LG, Gilroy S, Vivanco JM (2006). The role of root exudates in  
686 rhizosphere interactions with plants and other organisms. *Annu Rev Plant Biol* **57**: 233-266.
- 687  
688 Berg G (2009). Plant-microbe interactions promoting plant growth and health: perspectives  
689 for controlled use of microorganisms in agriculture. *Appl Microbiol Biotechnol* **84**: 11-18.
- 690  
691 Bodenhausen N, Horton MW, Bergelson J (2013). Bacterial communities associated with the  
692 leaves and the roots of *Arabidopsis thaliana*. *PloS one* **8**: e56329.
- 693  
694 Bowling SA, Guo A, Cao H, Gordon AS, Klessig DF, Dong X (1994). A mutation in  
695 *Arabidopsis* that leads to constitutive expression of systemic acquired resistance. *Plant Cell*  
696 **6**: 1845-1857.
- 697  
698 Bric JM, Bostock RM, Silverstone SE (1991). Rapid in situ assay for indoleacetic Acid  
699 production by bacteria immobilized on a nitrocellulose membrane. *Applied and*  
700 *environmental microbiology* **57**: 535-538.
- 701  
702 Bulgarelli D, Rott M, Schlaeppi K, van Themaat EVL, Ahmadinejad N, Assenza F *et al*  
703 (2012). Revealing structure and assembly cues for *Arabidopsis* root-inhabiting bacterial  
704 microbiota. *Nature* **488**: 91-95.
- 705  
706 Bulgarelli D, Garrido-Oter R, Munch PC, Weiman A, Droge J, Pan Y *et al* (2015). Structure  
707 and function of the bacterial root microbiota in wild and domesticated barley. *Cell Host*  
708 *Microbe* **17**: 392-403.
- 709  
710 Carvalhais LC, Dennis PG, Badri DV, Kidd BN, Vivanco JM, Schenk PM (2015). Linking  
711 Jasmonic Acid Signaling, Root Exudates, and Rhizosphere Microbiomes. *Mol Plant Microbe*  
712 *Interact* **28**: 1049-1058.
- 713  
714 Cha JY, Han S, Hong HJ, Cho H, Kim D, Kwon Y *et al* (2016). Microbial and biochemical  
715 basis of a *Fusarium* wilt-suppressive soil. *ISME J* **10**: 119-129.
- 716  
717 Chaparro JM, Badri DV, Bakker MG, Sugiyama A, Manter DK, Vivanco JM (2013). Root  
718 exudation of phytochemicals in *Arabidopsis* follows specific patterns that are  
719 developmentally programmed and correlate with soil microbial functions. *PLoS One* **8**:  
720 e55731.
- 721  
722 Chaparro JM, Badri DV, Vivanco JM (2014). Rhizosphere microbiome assemblage is  
723 affected by plant development. *ISME J* **8**: 790-803.
- 724  
725 Chater KF (2016). Recent advances in understanding *Streptomyces*. *F1000Res* **5**: 2795.
- 726

- 727 Chaurasia A, Meena BR, Tripathi AN, Pandey KK, Rai AB, Singh B (2018). Actinomycetes:  
728 an unexplored microorganisms for plant growth promotion and biocontrol in vegetable crops.  
729 *World J Microbiol Biotechnol* **34**: 132.
- 730  
731 DeSantis TZ, Hugenholtz P, Larsen N, Rojas M, Brodie EL, Keller K *et al* (2006).  
732 Greengenes, a chimera-checked 16S rRNA gene database and workbench compatible with  
733 ARB. *Appl Environ Microbiol* **72**: 5069-5072.
- 734  
735 Dowd SE, Callaway TR, Wolcott RD, Sun Y, McKeehan T, Hagevoort RG *et al* (2008a).  
736 Evaluation of the bacterial diversity in the feces of cattle using 16S rDNA bacterial tag-  
737 encoded FLX amplicon pyrosequencing (bTEFAP). *BMC Microbiol* **8**: 125.
- 738  
739 Dowd SE, Wolcott RD, Sun Y, McKeehan T, Smith E, Rhoads D (2008b). Polymicrobial  
740 nature of chronic diabetic foot ulcer biofilm infections determined using bacterial tag  
741 encoded FLX amplicon pyrosequencing (bTEFAP). *PLoS One* **3**: e3326.
- 742  
743 Dworkin M, Foster JW (1958). Experiments with some microorganisms which utilize ethane  
744 and hydrogen. *J Bacteriol* **75**: 592-603.
- 745  
746 Foster KR, Wenseleers T (2006). A general model for the evolution of mutualisms. *Journal*  
747 *of Evolutionary Biology* **19**: 1283-1293.
- 748  
749 Glick BR, Liu C, Ghosh S, Dumbroff EB (1997). Early development of canola seedlings in  
750 the presence of the plant growth-promoting rhizobacterium *Pseudomonas putida* GR12-2.  
751 *Soil Biology and Biochemistry* **29**: 1233-1239.
- 752  
753 Glick BR (2014). Bacteria with ACC deaminase can promote plant growth and help to feed  
754 the world. *Microbiol Res* **169**: 30-39.
- 755  
756 Haichar FE, Marol C, Berge O, Rangel-Castro JI, Prosser JI, Balesdent J *et al* (2008). Plant  
757 host habitat and root exudates shape soil bacterial community structure. *Isme Journal* **2**:  
758 1221-1230.
- 759  
760 Haichar FEZ, Heulin T, Guyonnet JP, Achouak W (2016). Stable isotope probing of carbon  
761 flow in the plant holobiont. *Curr Opin Biotechnol* **41**: 9-13.
- 762  
763 Haichar FZ, Roncato MA, Achouak W (2012). Stable isotope probing of bacterial community  
764 structure and gene expression in the rhizosphere of *Arabidopsis thaliana*. *FEMS Microbiol*  
765 *Ecol* **81**: 291-302.
- 766  
767 Hernández-León R, Rojas-Solís D, Contreras-Pérez M, Orozco-Mosqueda MdC, Macías-  
768 Rodríguez LI, Reyes-de la Cruz H *et al* (2015). Characterization of the antifungal and plant  
769 growth-promoting effects of diffusible and volatile organic compounds produced by  
770 *Pseudomonas fluorescens* strains. *Biol Control* **81**: 83-92.
- 771  
772 Holmes NA, Devine R, Qin Z, Seipke RF, Wilkinson B, Hutchings MI (2018). Complete  
773 genome sequence of *Streptomyces formicae* KY5, the formicamycin producer. *J Biotechnol*  
774 **265**: 116-118.
- 775

- 776 Inderbitzin P, Ward J, Barbella A, Solares N, Izyumin D, Burman P *et al* (2018). Soil  
777 Microbiomes Associated with *Verticillium* Wilt-Suppressive Broccoli and Chitin  
778 Amendments are Enriched with Potential Biocontrol Agents. *Phytopathology* **108**: 31-43.  
779
- 780 Ishiyama D, Vujaklija D, Davies J (2004). Novel pathway of salicylate degradation by  
781 *Streptomyces* sp. strain WA46. *Appl Environ Microbiol* **70**: 1297-1306.  
782
- 783 Jing HC, Anderson L, Sturre MJ, Hille J, Dijkwel PP (2007). *Arabidopsis* CPR5 is a  
784 senescence-regulatory gene with pleiotropic functions as predicted by the evolutionary theory  
785 of senescence. *J Exp Bot* **58**: 3885-3894.  
786
- 787 Jing HC, Hebel R, Oeljeklaus S, Sitek B, Stuhler K, Meyer HE *et al* (2008). Early leaf  
788 senescence is associated with an altered cellular redox balance in *Arabidopsis* cpr5/old1  
789 mutants. *Plant Biol (Stuttg)* **10 Suppl 1**: 85-98.  
790
- 791 Jirage D, Tootle TL, Reuber TL, Frost LN, Feys BJ, Parker JE *et al* (1999). *Arabidopsis*  
792 *thaliana* PAD4 encodes a lipase-like gene that is important for salicylic acid signaling. *Proc*  
793 *Natl Acad Sci U S A* **96**: 13583-13588.  
794
- 795 Kieser T, Bibb MJ, Buttner MJ, Chater KF, Hopwood DA (2000). *Practical Streptomyces*  
796 *genetics*. John Innes Foundation: Norwich.  
797
- 798 Kirik V, Bouyer D, Schobinger U, Bechtold N, Herzog M, Bonneville JM *et al* (2001). CPR5  
799 is involved in cell proliferation and cell death control and encodes a novel transmembrane  
800 protein. *Curr Biol* **11**: 1891-1895.  
801
- 802 Lebeis SL, Paredes SH, Lundberg DS, Breakfield N, Gehring J, McDonald M *et al* (2015).  
803 Salicylic acid modulates colonization of the root microbiome by specific bacterial taxa.  
804 *Science* **349**: 860-864.  
805
- 806 Lundberg DS, Lebeis SL, Paredes SH, Yourstone S, Gehring J, Malfatti S *et al* (2012).  
807 Defining the core *Arabidopsis thaliana* root microbiome. *Nature* **488**: 86-90.  
808
- 809 Mercado-Blanco J, Alós E, Rey MD, Prieto P (2016). *Pseudomonas fluorescens* PICF7  
810 displays an endophytic lifestyle in cultivated cereals and enhances yield in barley. *FEMS*  
811 *Microbiology Ecology* **92**: fiw092-fiw092.  
812
- 813 Neufeld JD, Vohra J, Dumont MG, Lueders T, Manefield M, Friedrich MW *et al* (2007).  
814 DNA stable-isotope probing. *Nat Protoc* **2**: 860-866.  
815
- 816 Palaniyandi SA, Damodharan K, Yang SH, Suh JW (2014). *Streptomyces* sp. strain PGPA39  
817 alleviates salt stress and promotes growth of 'Micro Tom' tomato plants. *J Appl Microbiol*  
818 **117**: 766-773.  
819
- 820 Qin Z, Munnoch JT, Devine R, Holmes NA, Seipke RF, Wilkinson KA *et al* (2017).  
821 Formicamycins, antibacterial polyketides produced by *Streptomyces formicae* isolated from  
822 African *Tetraponera* plant-ants. *Chemical Science*.  
823

- 824 Raza W, Ling N, Liu D, Wei Z, Huang Q, Shen Q (2016). Volatile organic compounds  
825 produced by *Pseudomonas fluorescens* WR-1 restrict the growth and virulence traits of  
826 *Ralstonia solanacearum*. *Microbiol Res* **192**: 103-113.
- 827  
828 Remans R, Spaepen S, Vanderleyden J (2006). Auxin signaling in plant defense. *Science*  
829 **313**: 171.
- 830  
831 Ren G, Ma Y, Guo D, Gentry TJ, Hu P, Pierson EA *et al* (2018). Soil Bacterial Community  
832 Was Changed after Brassicaceous Seed Meal Application for Suppression of *Fusarium* Wilt  
833 on Pepper. *Front Microbiol* **9**: 185.
- 834  
835 Rey T, Dumas B (2017). Plenty Is No Plague: *Streptomyces* Symbiosis with Crops. *Trends*  
836 *Plant Sci* **22**: 30-37.
- 837  
838 Scheuring I, Yu DW (2012). How to assemble a beneficial microbiome in three easy steps.  
839 *Ecology Letters* **15**: 1300-1307.
- 840  
841 Schlaeppi K, Dombrowski N, Oter RG, Ver Loren van Themaat E, Schulze-Lefert P (2014).  
842 Quantitative divergence of the bacterial root microbiota in *Arabidopsis thaliana* relatives.  
843 *Proc Natl Acad Sci U S A* **111**: 585-592.
- 844  
845 Schrey SD, Tarkka MT (2008). Friends and foes: streptomycetes as modulators of plant  
846 disease and symbiosis. *Antonie Van Leeuwenhoek* **94**: 11-19.
- 847  
848 Sun J, Kelemen GH, Fernandez-Abalos JM, Bibb MJ (1999). Green fluorescent protein as a  
849 reporter for spatial and temporal gene expression in *Streptomyces coelicolor* A3(2).  
850 *Microbiology* **145** ( Pt 9): 2221-2227.
- 851  
852 Tokala RK, Strap JL, Jung CM, Crawford DL, Salove MH, Deobald LA *et al* (2002). Novel  
853 plant-microbe rhizosphere interaction involving *Streptomyces lydicus* WYEC108 and the pea  
854 plant (*Pisum sativum*). *Appl Environ Microbiol* **68**: 2161-2171.
- 855  
856 van der Meij A, Worsley SF, Hutchings MI, van Wezel GP (2017). Chemical ecology of  
857 antibiotic production by actinomycetes. *FEMS Microbiol Rev* **41**: 392-416.
- 858  
859 van der Meij A, Willemsse J, Schneijderberg MA, Geurts R, Raaijmakers JM, van Wezel GP  
860 (2018). Inter- and intracellular colonization of *Arabidopsis* roots by endophytic actinobacteria  
861 and the impact of plant hormones on their antimicrobial activity. *Antonie Van Leeuwenhoek*  
862 **111**: 679-690.
- 863  
864 Viaene T, Langendries S, Beirinckx S, Maes M, Goormachtig S (2016). *Streptomyces* as a  
865 plant's best friend? *FEMS Microbiology Ecology*: fiw119.
- 866  
867 Weber T, Blin K, Duddela S, Krug D, Kim HU, Brucoleri R *et al* (2015). antiSMASH 3.0-a  
868 comprehensive resource for the genome mining of biosynthetic gene clusters. *Nucleic Acids*  
869 *Res* **43**: W237-243.
- 870  
871 Wei Z, Jousset A (2017). Plant Breeding Goes Microbial. *Trends Plant Sci* **22**: 555-558.
- 872

- 873 Weyl EG, Frederickson ME, Yu DW, Pierce NE (2010). Economic contract theory tests  
874 models of mutualism. *Proc Natl Acad Sci U S A* **107**: 15712-15716.  
875
- 876 Whipps JM (1990). Carbon economy. In: Lynch JM (ed). *The Rhizosphere*. John Wiley &  
877 Sons Ltd: Essex, UK. pp 59-97.  
878
- 879 Wildermuth MC, Dewdney J, Wu G, Ausubel FM (2001). Isochorismate synthase is required  
880 to synthesize salicylic acid for plant defence. *Nature* **414**: 562-565.  
881
- 882 Yang J, Kloepper JW, Ryu CM (2009). Rhizosphere bacteria help plants tolerate abiotic  
883 stress. *Trends Plant Sci* **14**: 1-4.  
884
- 885 Yu Y, Lee C, Kim J, Hwang S (2005). Group-specific primer and probe sets to detect  
886 methanogenic communities using quantitative real-time polymerase chain reaction.  
887 *Biotechnol Bioeng* **89**: 670-679.  
888
- 889 Zhalnina K, Louie KB, Hao Z, Mansoori N, da Rocha UN, Shi S *et al* (2018). Dynamic root  
890 exudate chemistry and microbial substrate preferences drive patterns in rhizosphere microbial  
891 community assembly. *Nat Microbiol* **3**: 470-480.  
892
- 893 Zhao CZ, Huang J, Gyaneshwar P, Zhao D (2017). *Rhizobium* sp. IRBG74 Alters  
894 *Arabidopsis* Root Development by Affecting Auxin Signaling. *Front Microbiol* **8**: 2556.  
895
- 896 Zhou N, Tootle TL, Tsui F, Klessig DF, Glazebrook J (1998). PAD4 functions upstream from  
897 salicylic acid to control defense responses in *Arabidopsis*. *Plant Cell* **10**: 1021-1030.  
898
- 899 Zhou X, Shen Y, Fu X, Wu F (2018). Application of Sodium Silicate Enhances Cucumber  
900 Resistance to *Fusarium* Wilt and Alters Soil Microbial Communities. *Front Plant Sci* **9**: 624.  
901  
902
